# Supplementary material for: Subseasonal precipitation forecasts of opportunity over central southwest Asia
Source: Copernicus journal article supplement (doi:10.5194/wcd-3-1183-2022), 2022-10-27
Supplement: Supplementary file 1 [file wcd-3-1183-2022-supplement.pdf]

Supplement of Weather Clim. Dynam., 3, 1183–1197, 2022  
<https://doi.org/10.5194/wcd-3-1183-2022-supplement>  
© Author(s) 2022. CC BY 4.0 License.

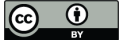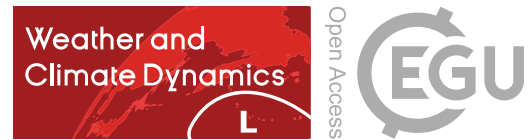

*Supplement of*

## **Subseasonal precipitation forecasts of opportunity over central southwest Asia**

**Melissa L. Breeden et al.**

*Correspondence to:* Melissa L. Breeden ([melissa.breeden@noaa.gov](mailto:melissa.breeden@noaa.gov))

The copyright of individual parts of the supplement might differ from the article licence.

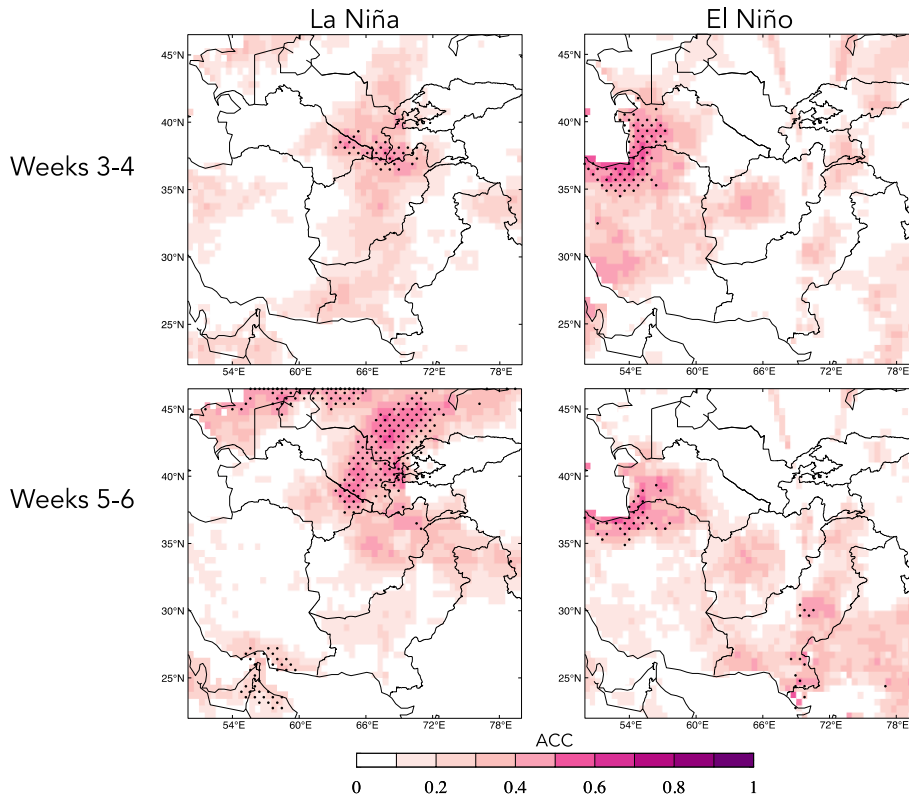

Figure S1: Anomaly correlation coefficient (ACC) for CHIRPS precipitation during the top 20% of La Niña dates (left) and El Niño events (right) for weeks 3-4 (top) and weeks 5-6 (bottom) forecasts. The black dots indicate where skill for the 20% of forecasts in each group is statistically significantly different from the remaining 80% of forecasts at the 95% confidence level, determined nonparametrically using bootstrapping with replacement.

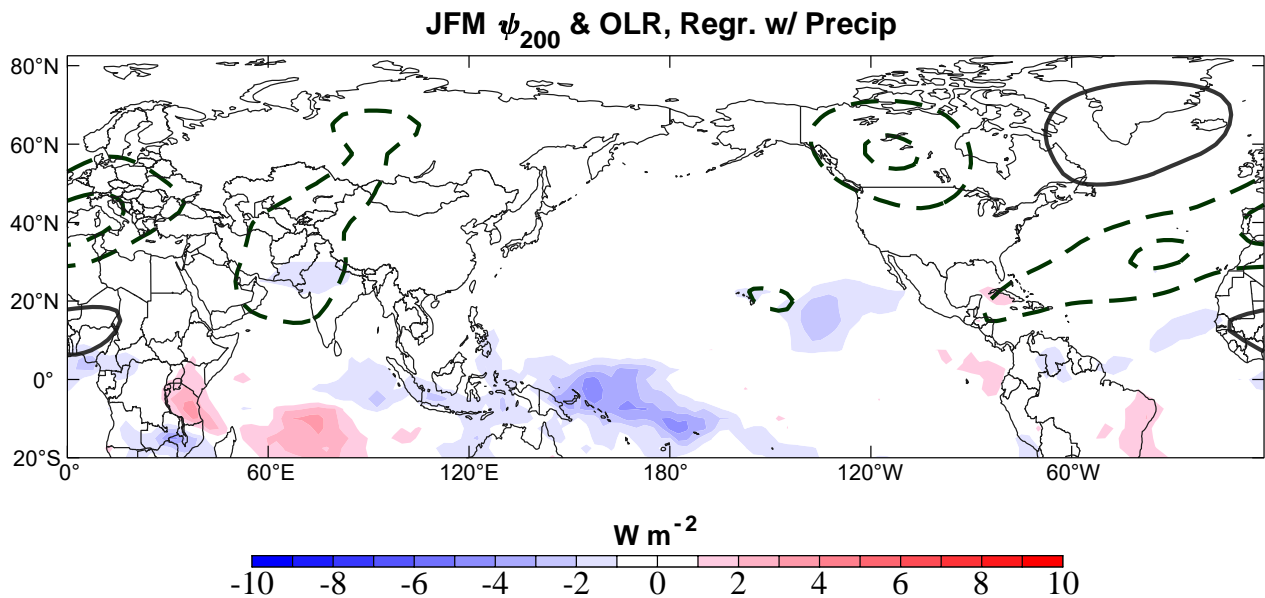

Figure S2: 18-day lagged regression (meaning the precipitation time series lags the OLR and 200-hPa streamfunction) of 200-hPa streamfunction (black contours) and OLR (color shading) with the time series of precipitation anomalies averaged over the central southwest Asia domain, 50-80°E, 22-48°N. 200-hPa streamfunction is contoured with positive (negative) anomalies in solid (dashed) black at a contour interval of  $1 \times 10^6 \text{ m}^2 \text{ s}^{-1}$ .
